# Supplementary material for: Molecular Characterization and Prevalence of Antimicrobial Resistant Escherichia coli Isolates Derived From Environmental Habitats
Source: Preprints.org preprint supplement (doi:10.20944/preprints202305.1186.v1), 2023-05-17
Supplement: Supplementary file 1 [file supplementary]

Research Article

Molecular Characterization and Prevalence of Antimicrobial Resistant *Escherichia coli* Isolates Derived from Clinical Specimens and Environmental Habitats

Chrysoula Dioli1, Olga Pappa1, Eirini Siatravani1, 2, Spyridoula Bratakou1, Apostolos Tatsiopoulos3, Panagiota Giakkoupi4, Vivi Miriagou2, Apostolos Beloukas1,*

1 Molecular Microbiology and Immunology laboratory, Department of Biomedical Sciences, University of West Attica, 28 Ag. Spyridonos str 12243 Athens, Attica, Greece; CD: [cdioli@uniwa.gr](mailto:cdioli@uniwa.gr); OP: [opappa@uniwa.gr](mailto:opappa@uniwa.gr); ES: [esiatravani@uniwa.gr](mailto:esiatravani@uniwa.gr); SB: [spbrat@uniwa.gr](mailto:spbrat@uniwa.gr); AB: [abeloukas@uniwa.gr](mailto:abeloukas@uniwa.gr)

| **Citation:** To be added by editorial staff during production.  Academic Editor: Firstname Lastname  Received: date  Revised: date  Accepted: date  Published: date  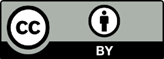  **Copyright:** © 2023 by the authors. Submitted for possible open access publication under the terms and conditions of the Creative Commons Attribution (CC BY) license (https://creativecommons.org/licenses/by/4.0/). |
| --- |

| **Citation:** To be added by editorial staff during production.  Academic Editor: Firstname Lastname  Received: date  Revised: date  Accepted: date  Published: date  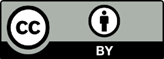  **Copyright:** © 2023 by the authors. Submitted for possible open access publication under the terms and conditions of the Creative Commons Attribution (CC BY) license (https://creativecommons.org/licenses/by/4.0/). |
| --- |

2 Hellenic Pasteur Institute, Laboratory of Bacteriology, 127 Vasilissis Sofias Avenue 11521, Athens, Greece; VM: [miriagou@pasteur.gr](mailto:miriagou@pasteur.gr)

3 Microbiology Laboratory, General Hospital of Livadeia, Agiou Vlasiou, 32100, Livadia, Viotia, Greece; AT: [apotatsiop@yahoo.com](mailto:apotatsiop@yahoo.com)

| **Citation:** To be added by editorial staff during production.  Academic Editor: Firstname Lastname  Received: date  Revised: date  Accepted: date  Published: date  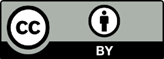  **Copyright:** © 2023 by the authors. Submitted for possible open access publication under the terms and conditions of the Creative Commons Attribution (CC BY) license (https://creativecommons.org/licenses/by/4.0/). |
| --- |

4 Department of Public Health Policy, School of Public Health University of West Attica, 196 Alexandras Avenue, 11521 Athens, Greece; PG: pgiakkoupi@uniwa.gr

*** Correspondence:** [abeloukas@uniwa.gr](mailto:abeloukas@uniwa.gr), orcid ID: 0000-0001-5639-0528 Apostolos Beloukas, PhD, Associate Professor in Molecular Microbiology and Virology Head of the Molecular Microbiology and Immunology Laboratory, Department of Biomedical Sciences, University of West Attica, Postal address: 28 Ag. Spyridonos str 12243 Athens, Attica, Greece

**SUPPLEMENTARY MATERIAL**

**Supplementary Table S1**: The *E. coli* isolates from environmental habitats and clinical specimens that exhibit multidrug resistance.

**Supplementary** **Table S2**: Observed patterns of R isolates (RP, resistant patterns).

**Supplementary Table S3**: Characteristics of environmental and clinical isolates harboring β-lactamase genes.

**Supplementary** **Table S4**: Sequencing results for the possible β-lactamase producers.

**Supplementary Table S5a**: Examination of the relationship between phylogenetic groups and origin of the sample; Sample and Group Crosstabulation.

**Supplementary Table S5b**: Examination of the relationship between phylogenetic groups and origin of the sample; Pearson's chi-square test results.

**Supplementary Table S6a:** Examination of the relationship between phylogenetic groups and resistance profile; Resistance profile and Group Crosstabulation.

**Supplementary Table S6b**: Examination of the relationship between phylogenetic groups and resistance profile;Pearson's chi-square test results.

**Supplementary Figure S1**: PFGE analysis; Diverse PFGE patterns of *E. coli* isolated from clinical and environmental samples.

**Supplementary Figure S2**: Maximum Likelihood phylogenetic trees for A) *bla*CTX-M-groups, B) *bla*TEM and C) *bla*SHV nucleotide sequences

| **Supplementary** **Table S1.** The *E. coli* isolates from environmental habitats and clinical specimens that exhibit multidrug resistance | | | | | | | |
| --- | --- | --- | --- | --- | --- | --- | --- |
| **Number of different antibiotic categories in which environmental MDR isolates presented resistance** | **Number of environmental isolates obtained from each sample source** | | | | | | |
| **HWW** | **WWTP effluents** | | **RWS1** | **RWS2** | | **Total** |
| 4 antibiotic categories | 5 | 8 | | 16 | 6 | | 35 |
| 5 antibiotic categories | 8 | 20 | | 8 | 4 | | 40 |
| 6 antibiotic categories | 10 |  | | 3 |  | | 13 |
| 7 antibiotic categories | 13 |  | |  | 1 | | 14 |
| **Total MDR** | 36 | 28 | | 27 | 11 | | 102 |
| **Number of different antibiotic categories in which clinical MDR isolates presented resistance** | **Number of clinical isolates per specimen type** | | | | | | |
| **Urine** | | **Blood** | | | **Tissue** | **Total** |
| 4 antibiotic categories | 2 | | 1 | | |  | 3 |
| 5 antibiotic categories | 5 | | 1 | | |  | 6 |
| 6 antibiotic categories | 5 | | 1 | | | 1 | 7 |
| 7 antibiotic categories | 2 | | 1 | | |  | 3 |
| **Total MDR** | 14 | | 4 | | | 1 | 19 |
| Abbreviations: MDR, Multi-drug resistant; HWW, hospital wastewater; WWTP, wastewater treatment plant; RWS1, river water site 1; RWS2, river water site 2. | | | | | | | |

| **‍Supplementary Table S2:** Observed patterns of R isolates (RP, resistant patterns) | | | | | |
| --- | --- | --- | --- | --- | --- |
|  | | | **Environmental isolates (source)** | **Clinical Isolates** | **Total** |
| **RP1**: Related to ESBL production | | PEN/ ESCs | 4 (2 RWS1, 2 RWS2) | - | 4 |
| PEN/ ESCs/ ATM | - | 2 | 2 |
| **RP2**: Related to Ampc β-lactamases production | | PEN/ PEN.-inhibitor/ FOX | - | 1 | 1 |
| **RP3a** | | PEN/ PEN-inhibitor | 56 (30 WWTP, 18 RWS1, 8 RWS2) | 19 | 75 |
| **RP3b** | | PEN/ PEN-inhibitor + SXT | 20 (3 HWW, 8 WWTP, 5 RWS1, 4 RWS2) | 1 | 21 |
| **RP3c** | | PEN/ PEN-inhibitor + AMG | 4 (3 WWTP, 1 RWS1) | 2 | 6 |
| **RP3d** | | PEN/ PEN-inhibitor + QNs | 18 (2 HWW, 9 WWTP, 3 RWS1, 4 RWS2) | - | 18 |
| **RP4a** | | PEN | 33 (13 WWTP, 18 RWS1, 2 RWS2) | 8 | 41 |
| **RP4b** | | PEN + SXT | 14 (2 WWTP, 10 RWS1, 2 RWS2) | 4 | 18 |
| **RP4c** | | PEN + SXT+ QNs | 11 (3 WWTP, 8 RWS1) | - | 11 |
| **RP4d** | | PEN + QNs | 10 (3 WWTP, 5 RWS1, 2 RWS2) | - | 10 |
| **RP4e** | | PEN + AMG + QNs | - | 1 | 1 |
| **RP4f** | | PEN + AMG | 5 (1 WWTP, 2 RWS1, 2 RWS2) | 1 | 5 |
| **RP4g** | | PEN + SXT + AMG | - | 3 | 3 |
| **RP5** | Resistant only to  non β-lactam antibiotics | QNs | 5 (3 HWW, 2 WWTP) | 15 | 20 |
| **RP6** | SXT | - | 4 | 4 |
| **RP6a** | SXT + QNs | 3 (2 RWS1, 1 RWS2) | 3 | 7 |
| Abbreviations: RP, resistant patterns; ESBL, extended-spectrum-β-lactamase; PEN, penicillins; ESCs, extended-spectrum cephalosporins; ATM, aztreonam; PEN.-inhibitor, penicillin-inhibitor combination; FOX, cefoxitin; SXT, sulfamethoxazole-trimethoprim; AMG, aminoglycosides; QNs, quinolones; HWW, hospital wastewater; WWTP, wastewater treatment plant; RWS1, river water site 1; RWS2, river water site 2. | | | | | |

| **Supplementary Table S3.** Characteristics of environmental and clinical isolates harboring β-lactamse genes | | | | | | |
| --- | --- | --- | --- | --- | --- | --- |
| **Isolate ID** | **Type of Sample/ Sampling site** | **Phylogenetic group** | **Resistance Pattern** | **Resistance Profile** | **DDST** | **β-lactamases** |
| 297 | Treated Wastewater/ WWTP outlet | A | AMP, AMC, PIP, CAZ, CRO, ATM, AN | MDR | + | SHV |
| 326 | Treated Wastewater/ WWTP outlet | B2 | AMP, PIP, MEM, IMP | R |  | TEM |
| 344 | HWW/ septic tank | A | AMP, PIP, CXM, CAZ, CTX, FEP, CRO, ATM, CIP, NAL | MDR | + | SHV |
| 345 | HWW/ septic tank | A | AMP, PIP, CAZ, CTX, CRO, ATM, NAL | MDR | + | SHV |
| 367 | River water/ RWS1 | A | AMP, AMC, TZP, PIP, CXM, CAZ, CTX, FEP, FOX, CRO, ATM, MEM, IMP | MDR | - | - |
| 405 | River water/ RWS1 | D | AMP, AMC, PIP, CXM, CTX, CRO, ATM, CIP, NAL | MDR | + | CTX-M group 1 |
| 408 | River water/ RWS1 | D | AMP, AMC, TZP, PIP, TCC, CXM, CAZ, CTX, FEP, CRO, ATM, MEM, SXT | MDR | + | CTX-M group 1, OXA-48 |
| 426 | HWW/ septic tank | D | AMP, AMC, PIP, CXM, CAZ, CTX, CRO, ATM, CIP, NAL | MDR | + | SHV |
| 427 | HWW/ septic tank | B2 | AMP, AMC, PIP, CXM, CAZ, CTX, CRO, ATM, AN, CIP, NAL | MDR | + | SHV |
| 431 | HWW/ septic tank | B2 | AMP, PIP, CXM, CAZ, CTX, CRO, ATM, AN, CIP, NAL | MDR | + | SHV |
| 434 | HWW/ septic tank | B2 | AMP, AMC, PIP, CAZ, CTX, CRO, ATM, CIP, NAL | MDR | + | SHV |
| 436 | HWW/ septic tank | B2 | AMP, AMC, PIP, CXM, CAZ, CTX, CRO, ATM, AN, CIP, NAL | MDR | + | SHV |
| 472 | River water/ RWS1 | A | AMP, AMC, PIP, CXM, CTX, CRO, ATM, NAL | MDR | + | CTX-M group 9, TEM |
| 477 | River water/ RWS1 | B1 | AMP, PIP, CXM, CAZ, CRO, ATM, CIP, NAL | MDR | + | SHV |
| 491 | Treated Wastewater/ WWTP outlet | A | AMP, AMC, PIP, CXM, CTX, CRO, FEP, ATM, NAL | MDR | + | CTX-M group 1 |
| 494 | Treated Wastewater/ WWTP outlet | B1 | AMP, AMC, PIP, CXM, CTX, CRO, SXT | MDR | + | TEM |
| 497 | Treated Wastewater/ WWTP outlet | A | AMP, AMC, PIP, CXM, CAZ, CTX, FEP, CRO, ATM, NAL | MDR | + | CTX-M group 1 |
| 506 | Treated Wastewater/ WWTP outlet | D | AMP, PIP, CXM, CAZ, CTX, FEP, ATM, SXT, NAL | MDR | + | CTX-M group 1 |
| 510 | Treated Wastewater/ WWTP outlet | B2 | AMP, PIP, CXM, CTX, CRO, SXT, CIP, NAL | MDR | + | - |
| 546 | HWW/ septic tank | B2 | AMP, AMC, PIP, CXM, CAZ, CTX, CRO, ATM, NAL | MDR | + | SHV |
| 550 | HWW/ septic tank | A | AMP, AMC, TZP, PIP, CXM, FOX, FEP, GM, SXT, CIP, NAL | MDR | - | - |
| 553 | HWW/ septic tank | A | AMP, AMC, PIP, CXM, CTX, CRO, ATM, SXT, CIP, NAL | MDR | + | CTX-M group 1 |
| 555 | HWW/ septic tank | A | AMP, AMC, PIP, CXM, CAZ, CTX, FEP, CRO, ATM, GM, SXT, CIP, NAL | MDR | + | CTX-M group 1 |
| 556 | HWW/ septic tank | A | AMP, PIP, CXM, CAZ, CTX, FEP, CRO, ATM, CIP, NAL | MDR | + | SHV |
| 557 | HWW/ septic tank | A | AMP, AMC, PIP, CXM, CTX, FEP, CRO, ATM, GN, SXT, CIP, NAL | MDR | + | CTX-M group 1, TEM, SHV |
| 581 | HWW/ septic tank | A | AMP, AMC, TZP, PIP, CXM, FOX, FEP, GM, SXT, NAL, CIP | MDR | - | FOX |
| 594 | River water/ RWS1 | B1 | AMP, PIP, CXM, CAZ, CTX, CRO, ATM, CIP, NAL | MDR | + | SHV |
| 595 | River water/ RWS1 | B2 | AMP, PIP, CXM, CAZ, CTX, FEP, CRO, ATM | MDR | + | CTX-M group 1 |
| 598 | River water/ RWS1 | D | AMP, PIP, CXM, CAZ, CTX, FEP, CRO, ATM, GN, SXT, NAL | MDR | + | CTX-M group 1 |
| 601 | River water/ RWS1 | A | AMP, PIP, CXM, CAZ, CTX, FEP, CRO | R | + | CTX-M group 9 |
| 602 | River water/ RWS1 | A | AMP, PIP, CXM, CAZ, CRO, ATM | MDR | + | - |
| 610 | River water/ RWS1 | D | AMP, PIP, CXM, CAZ, CTX, FEP, CRO, ATM, GN, SXT, NAL | MDR | + | CTX-M group 1 |
| 611 | River water/ RWS1 | A | AMP, PIP, CXM, CTX, FEP, CRO | R | + | CTX-M group 9 |
| 614 | River water/ RWS2 | A | AMP, PIP, CXM, CTX, FEP, CRO | R | + | CTX-M group 9 |
| 616 | River water/ RWS2 | A | AMP, PIP, CXM, CTX, FEP, CRO | R | + | CTX-M group 9 |
| 618 | River water/ RWS2 | A | AMP, AMC, PIP, CXM, CAZ, CTX, FEP, CRO, ATM | MDR | + | CTX-M group 9 |
| 620 | River water/ RWS2 | A | AMP, PIP, CXM, CTX, FEP, CRO, ATM, AN | MDR | + | - |
| 630 | River water/ RWS2 | A | AMP, AMC, PIP, CXM, CTX, FEP, CRO, ATM, AN | MDR | + | - |
| 638 | Treated Wastewater/ WWTP outlet | D | AMP, PIP, CXM, CAZ, CTX, FEP, CRO, ATM, SXT, NAL | MDR | + | CTX-M group 1 |
| 645 | Treated Wastewater/ WWTP outlet | D | AMP, AMC, PIP, CXM, CAZ, CTX, FEP, CRO, ATM, NAL | MDR | + | CTX-M group 1 |
| 673 | HWW/ septic tank | A | AMP, PIP, CAZ, CRO, ATM, NAL | MDR | + | SHV |
| 678 | HWW/ septic tank | A | AMP, AMC, PIP, CXM, CAZ, CTX, FEP, CRO, ATM, GN, SXT, CIP, NAL | MDR | + | CTX-M group 1 |
| 681 | HWW/ septic tank | A | AMP, PIP, CXM, CTX, FEP, CRO, ATM, GN, SXT, CIP, NAL | MDR | + | CTX-M group 1 |
| 682 | HWW/ septic tank | A | AMP, AMC, PIP, CXM, CAZ, CTX, FEP, CRO, ATM, GN, SXT, CIP, NAL | MDR | + | CTX-M group 1 |
| 683 | HWW/ septic tank | A | AMP, AMC, PIP, CXM, CAZ, CTX, FEP, CRO, ATM, GN, SXT, CIP, NAL | MDR | + | CTX-M group 1 |
| 738 | River water/ RWS1 | B2 | AMP, AMC, TZP, PIP, CXM, FOX, CAZ, GM, AN | MDR | - | TEM |
| 739 | River water/ RWS1 | A | AMP, PIP, CXM, CAZ, CTX, CRO, ATM, CIP, NAL | MDR | + | SHV |
| 740 | River water/ RWS1 | A | AMP, PIP, CXM, CAZ, CTX, FEP, CRO, ATM, SXT | MDR | + | CTX-M group 1 |
| 748 | River water/ RWS1 | D | AMP, AMC, PIP, CXM, CAZ, CTX, FEP, CRO, ATM, NAL | MDR | + | CTX-M group 1 |
| 785 | River water/ RWS2 | D | AMP, AMC, PIP, CXM, CAZ, CTX, FEP, CRO, ATM, IMP, SXT, NAL | MDR | + | CTX-M group 1 |
| 791 | River water/ RWS2 | D | AMP, PIP, CXM, CAZ, CTX, FEP, CRO, ATM, CIP, NAL | MDR | + | CTX-M group 1 |
| 792 | Treated Wastewater/ WWTP outlet | A | AMP, PIP, CXM, CAZ, CTX, FEP, CRO, ATM, SXT | MDR | + | CTX-M group 1 |
| 801 | Treated Wastewater/ WWTP outlet | A | AMP, PIP, CXM, CAZ, CTX, FEP, CRO, ATM, SXT | MDR | + | CTX-M group 1 |
| 802 | Treated Wastewater/ WWTP outlet | A | AMP, PIP, CXM, CAZ, CTX, FEP, CRO, ATM, SXT | MDR | + | CTX-M group 1 |
| 803 | Treated Wastewater/ WWTP outlet | A | AMP, PIP, CXM, CAZ, CTX, FEP, CRO, ATM, SXT | MDR | + | CTX-M group 1 |
| 806 | Treated Wastewater/ WWTP outlet | A | AMP, PIP, CXM, CAZ, CTX, FEP, CRO, ATM, STX | MDR | + | CTX-M group 1 |
| 810 | Treated Wastewater/ WWTP outlet | B2 | AMP, PIP, CXM, CAZ, CTX, FEP, CRO, ATM, STX | MDR | + | CTX-M group 9 |
| 838 | HWW/ septic tank | A | AMP, PIP, CXM, CAZ, CTX, FEP, CRO, ATM, GM, SXT, CIP, NAL | MDR | + | CTX-M group 1 |
| 839 | HWW/ septic tank | A | AMP, PIP, CXM, CAZ, CTX, FEP, CRO, ATM, GM, SXT, CIP, NAL | MDR | + | CTX-M group 1 |
| 852 | HWW/s eptic tank | B2 | AMP, PIP, CXM, CAZ, CTX, FEP, CRO, ATM, AN, CIP, NAL | MDR | + | CTX-M group 1 |
| 858 | HWW/ septic tank | A | AMP, AMC, PIP, CXM, CAZ, CTX, FOX, CRO, ATM, IMP | MDR | - | CMY |
| 117cli | Clinical/ urine | A | AMP, AMC, PIP, CXM, CAZ, CTX, FEP, CRO, ATM, STX | MDR | + | CTX-M group 1, TEM |
| 203cli | Clinical/ blood | D | AMP, AMC, PIP CXM, CAZ, CTX, FOX, CRO, ATM, STX, NAL | MDR | + | CTX-M group 1, TEM |
| 22cli | Clinical/ urine | B2 | AMP, AMC, PIP, CXM, CAZ, CTX, FEP, CRO, ATM, AN (I), CIP, NAL | MDR | + | CTX-M group 1 |
| 294cli | Clinical/ urine | B2 | AMP, PIP, CXM, CTX, CRO, ATM | R | + | CTX-M group 1 |
| 325cli | Clinical/ blood | A | AMP, PIP, CXM, CAZ, CTX, CRO, ATM | R | + | CTX-M group 1 |
| 333cli | Clinical/ wound | B2 | AMP, AMC, PIP, CXM, CTX, FEP, CRO, ATM, GM, CIP, NAL | MDR | + | CTX-M group 1, SHV |
| 350cli | Clinical/ urine | B2 | AMP, PIP, CXM, CAZ, CTX, CRO, FEP, ATM, SXT, CIP, NAL | MDR | + | CTX-M group 1 |
| 54cli | Clinical/ urine | B2 | AMP, AMC, PIP, TZP, TCC, CXM, CAZ, CTX, FEP, CRO, ATM, GM, AN, CIP, NAL | MDR | + | CTX-M group 1, TEM |
| 59cli | Clinical/ blood | D | AMP, AMC, PIP, TZP, TCC, CXM, CAZ, CTX, FEP, CRO, ATM, SXT, NAL | MDR | + | CTX-M-group 1, TEM |
| 60cli | Clinical/ urine | B2 | AMP, AMC, PIP, TCC, CXM, CTX (I), CRO, ATM (I), AN, SXT, CIP, NAL | MDR | + | CTX-M group 1 |
| 84cli | Clinical/ urine | D | AMP, AMC, PIP, CXM, CAZ, CTX, FEP, CRO, FOX, ATM | MDR | + |  |
| Abbreviations: DDST, double disk synergy test; HWW, hospital wastewater; WWTP, wastewater treatment plant; RWS1, river water site 1; RWS2, river water site 2; AMP, ampicillin; AMC, amoxicillin/clavulanic acid; TZP, piperacillin/ tazobactam; PIP, piperacillin; CXM, cefuroxime; CAZ, ceftazidime; CTX, cefotaxime; FOX, cefoxitin; FEP, cefepime; CRO, ceftriaxone; ATM, aztreonam; MEM, meropenem; IMP, imipenem; GM, gentamicin; AN, amikacin; SXT, sulfamethoxazole-trimethoprim; CIP, ciprofloxacin; NAL, nalidixic acid; MDR, multi-drug resistant; R, resistant. | | | | | | |

| **Supplementary Table S4.** Sequencing results for the possible β-lactamase producers | | | | |
| --- | --- | --- | --- | --- |
| ***E. coli* isolates** | **NCBI Reference Sequence** | ***bla* gene** | **Query cover** | **Identity value** |
| *E. coli*-22_CTX-M-group 1  (clinical/ urine) | [NG_048935.1](https://www.ncbi.nlm.nih.gov/nuccore/NG_048935.1" \l "_blank) | *bla*CTX-M-15-like (ESBL) | 99% | 99.04% |
| *E. coli*-59_CTX-M-group 1  (clinical/ blood) | [NG_048935.1](https://www.ncbi.nlm.nih.gov/nuccore/NG_048935.1" \l "_blank) | *bla*CTX-M-15-like (ESBL) | 97% | 99.27% |
| *E. coli*-60_CTX-M-group 1  (clinical/ urine) | [NG_048935.1](https://www.ncbi.nlm.nih.gov/nuccore/NG_048935.1" \l "_blank) | *bla*CTX-M-15-like (ESBL) | 99% | 99.74% |
| *E. coli*-491_CTX-M group 1 (environmental/ WWTP) | [NG_048897.1](https://www.ncbi.nlm.nih.gov/nuccore/NG_048897.1" \l "_blank) | *bla*CTX-M-1-like (ESBL) | 96% | 99.27% |
| *E. coli*-678_CTX-M-group 1  (environmental/ HWW) | [NG_048935.1](https://www.ncbi.nlm.nih.gov/nuccore/NG_048935.1" \l "_blank) | *bla*CTX-M-15-like (ESBL) | 95% | 99.51% |
| *E. coli*-472_CTX-M-group 9 (environmental/ RWS1) | [NG_049043.1](https://www.ncbi.nlm.nih.gov/nuccore/NG_049043.1" \l "_blank) | *bla*CTX-M-9-like (ESBL) | 90% | 99.39% |
| *E. coli*-616_CTX-M-group 9 (environmental/ RSW2) | [NG_049043.1](https://www.ncbi.nlm.nih.gov/nuccore/NG_049043.1" \l "_blank) | *bla*CTX-M-9 (ESBL) | 90% | 100% |
| *E. coli*-618_CTX-M-group 9 (environmental/ RSW2) | [NG_049043.1](https://www.ncbi.nlm.nih.gov/nuccore/NG_049043.1" \l "_blank) | *bla*CTX-M-9 (ESBL) | 98% | 100% |
| E. *coli*-858_CMY-2 like AmpC (environmental/ HWW) | [NG_048834.1](https://www.ncbi.nlm.nih.gov/nuccore/NG_048834.1" \l "_blank) | *bla*CMY-4-like (AmpC type β-lactamases) | 97% | 99.81% |
| *E. coli-*581_FOX like AmpC (environmental/ HWW) | [NG_068170.1](https://www.ncbi.nlm.nih.gov/nuccore/NG_068170.1" \l "_blank) | *bla*FOX-17 (AmpC type β-lactamases) | 98% | 100% |
| *E. coli*-408_ΟΧΑ-48 like (environmental/ RWS1) | [NG_049539.1](https://www.ncbi.nlm.nih.gov/nuccore/NG_049539.1" \l "_blank) | *bla* OXA-244 (carbapenemase_OXA-48 family class D β-lactamase) | 99% | 100% |
| *E. coli-*297_SHV-like  (environmental/ WWTP) | [NG_050087.1](https://www.ncbi.nlm.nih.gov/nuccore/NG_050087.1" \l "_blank) | *bla*SHV-5-like (ESBL) | 97% | 99.14% |
| *E. coli-*333_SHV-like  (clinical/ wound) | [NG_050008.1](https://www.ncbi.nlm.nih.gov/nuccore/NG_049989.1" \l "_blank) | *bla*SHV-13-like (ESBL) | 97% | 99.57% |
| E._coli-427_SHV-like_(environmental/HWW) | NG_050008.1 | *bla*SHV-13-like (ESBL) | 97% | 99.13% |
| *E. coli*-739_SHV-like (environmetal/RWS1) | NG_050008.1 | *bla*SHV-13 (ESBL) | 97% | 100% |
| *E. coli*-203_TEM-like  (clinical/ blood) | NG_050186.1 | *bla*TEM-143-like (ESBL) | 99% | 99.88% |
| *E. coli*-494_TEM-like  (environmental/ WWTP) | NG_050239.1 | *Bla*TEM-207 (ESBL) | 99% | 99.75% |
| *E. coli*-738_TEM-like  (environmental/ RWS1) | NG_050186.1 | *bla*TEM-143-like (ESBL) | 99% | 99.88% |
| Abbreviations: ESBL, extended-spectrum-β-lactamase; HWW, hospital wastewater; WWTP, wastewater treatment plant; RWS1, river water site 1; RWS2, river water site 2. | | | | |

| **Supplementary Table S5a:** Examination of the relationship between phylogenetic groups and origin of the sample; Sample and Group Crosstabulation | | | | | | | |
| --- | --- | --- | --- | --- | --- | --- | --- |
|  | | | **Groups** | | | | **Total** |
| **B1** | **B2** | **D** | **A** |
| **Samples** | **RWS1** | Count | 28 | 31 | 28 | 76 | 163 |
| Expected Count | 23.1 | 47.3 | 24.7 | 67.9 | 163.0 |
| Residual | 4.9 | -16.3 | 3.3 | 8.1 |  |
| Standardized Residual | 1.0 | -2.4 | .7 | 1.0 |  |
| **Adjusted Residual** | **1.3** | **-3.3** | **.8** | **1.5** |  |
| **RWS2** | Count | 12 | 7 | 10 | 34 | 63 |
| Expected Count | 8.9 | 18.3 | 9.5 | 26.2 | 63.0 |
| Residual | 3.1 | -11.3 | .5 | 7.8 |  |
| Standardized Residual | 1.0 | -2.6 | .2 | 1.5 |  |
| **Adjusted Residual** | **1.2** | **-3.3** | **.2** | **2.1** |  |
| **WWTP** | Count | 25 | 38 | 30 | 78 | 171 |
| Expected Count | 24.3 | 49.6 | 25.9 | 71.2 | 171.0 |
| Residual | .7 | -11.6 | 4.1 | 6.8 |  |
| Standardized Residual | .1 | -1.6 | .8 | .8 |  |
| **Adjusted Residual** | **.2** | **-2.3** | **1.0** | **1.2** |  |
| **HWW** | Count | 20 | 26 | 5 | 54 | 105 |
| Expected Count | 14.9 | 30.5 | 15.9 | 43.7 | 105.0 |
| Residual | 5.1 | -4.5 | -10.9 | 10.3 |  |
| Standardized Residual | 1.3 | -.8 | -2.7 | 1.6 |  |
| **Adjusted Residual** | **1.6** | **-1.1** | **-3.2** | **2.2** |  |
| **Clinical** | Count | 6 | 84 | 24 | 25 | 139 |
| Expected Count | 19.7 | 40.3 | 21.0 | 57.9 | 139.0 |
| Residual | -13.7 | 43.7 | 3.0 | -32.9 |  |
| Standardized Residual | -3.1 | 6.9 | .6 | -4.3 |  |
| **Adjusted Residual** | **-3.8** | **9.2** | **.8** | **-6.4** |  |
| **Total** | | Count | 91 | 186 | 97 | 267 | 641 |
| Expected Count | 91.0 | 186.0 | 97.0 | 267.0 | 641.0 |

| **Supplementary Table S5b**: Examination of the relationship between phylogenetic groups and origin of the sample; Pearson's chi-square test results | | | |
| --- | --- | --- | --- |
|  | **Value** | **df** | **Asymptotic Significance (2-sided)** |
| Pearson Chi-Square | 110.630a | 12 | <.001 |
| Likelihood Ratio | 113.156 | 12 | <.001 |
| Linear-by-Linear Association | 10.731 | 1 | .001 |
| N of Valid Cases | 641 |  |  |
| a 0 cells (0.0%) have expected count less than 5. The minimum expected count is 8.94. | | | |

| **Supplementary Table S6a.** Examination of the relationship between phylogenetic groups and resistance profile; Resistance profile and Group Crosstabulation | | | | | | | |
| --- | --- | --- | --- | --- | --- | --- | --- |
|  | | | **Groups** | | | | **Total** |
| B1 | A | B2 | D |
| **Environmental Resistance profile** | **MDR** | Count | 6 | 53 | 23 | 20 | 102 |
| Expected Count | 16.4 | 42.5 | 27.7 | 15.4 | 102.0 |
| Residual | -10.4 | 10.5 | -4.7 | 4.6 |  |
| Standardized Residual | -2.6 | 1.6 | -.9 | 1.2 |  |
| **Adjusted Residual** | **-3.1** | **2.3** | **-1.1** | **1.4** |  |
| **R** | Count | 19 | 92 | 43 | 28 | 182 |
| Expected Count | 29.2 | 75.8 | 49.4 | 27.5 | 182.0 |
| Residual | -10.2 | 16.2 | -6.4 | .5 |  |
| Standardized Residual | -1.9 | 1.9 | -.9 | .1 |  |
| **Adjusted Residual** | **-2.4** | **2.9** | **-1.3** | **.1** |  |
| **N-WT** | Count | 1 | 8 | 3 | 1 | 13 |
| Expected Count | 2.1 | 5.4 | 3.5 | 2.0 | 13.0 |
| Residual | -1.1 | 2.6 | -.5 | -1.0 |  |
| Standardized Residual | -.8 | 1.1 | -.3 | -.7 |  |
| **Adjusted Residual** | **-.8** | **1.5** | **-.3** | **-.8** |  |
| **WT** | Count | 71 | 89 | 21 | 24 | 205 |
| Expected Count | 32.9 | 85.4 | 55.6 | 31.0 | 205.0 |
| Residual | 38.1 | 3.6 | -34.6 | -7.0 |  |
| Standardized Residual | 6.6 | .4 | -4.6 | -1.3 |  |
| **Adjusted Residual** | **8.8** | **.6** | **-6.6** | **-1.7** |  |
| **Clinical Resistance profile** | **S clinical** | Count | 1 | 11 | 38 | 6 | 56 |
| Expected Count | 9.0 | 23.3 | 15.2 | 8.5 | 56.0 |
| Residual | -8.0 | -12.3 | 22.8 | -2.5 |  |
| Standardized Residual | -2.7 | -2.6 | 5.8 | -.8 |  |
| **Adjusted Residual** | **-3.0** | **-3.5** | **7.2** | **-1.0** |  |
| **MDR** | Count | 0 | 2 | 11 | 6 | 19 |
| Expected Count | 3.1 | 7.9 | 5.2 | 2.9 | 19.0 |
| Residual | -3.1 | -5.9 | 5.8 | 3.1 |  |
| Standardized Residual | -1.7 | -2.1 | 2.6 | 1.8 |  |
| **Adjusted Residual** | **-1.9** | **-2.8** | **3.1** | **2.0** |  |
| **R** | Count | 5 | 12 | 35 | 12 | 64 |
| Expected Count | 10.3 | 26.7 | 17.4 | 9.7 | 64.0 |
| Residual | -5.3 | -14.7 | 17.6 | 2.3 |  |
| Standardized Residual | -1.6 | -2.8 | 4.2 | .7 |  |
| **Adjusted Residual** | **-1.9** | **-3.9** | **5.2** | **.9** |  |
| **Total** | | Count | 103 | 267 | 174 | 97 | 641 |
| Expected Count | 103.0 | 267.0 | 174.0 | 97.0 | 641.0 |

| **Supplementary Table S6b.** Examination of the relationship between phylogenetic groups and resistance profile; Pearson's chi-square test results | | | |
| --- | --- | --- | --- |
|  | **Value** | **df** | **Asymptotic Significance (2-sided)** |
| Pearson Chi-Square | 184.099a | 18 | <.001 |
| Likelihood Ratio | 179.391 | 18 | <.001 |
| Linear-by-Linear Association | 4.029 | 1 | .045 |
| N of Valid Cases | 641 |  |  |
| a 5 cells (17.9%) have expected count less than 5. The minimum expected count is 1.97. | | | |

| 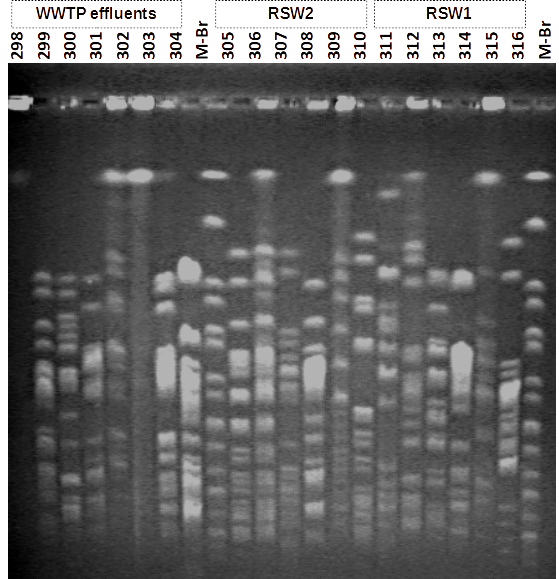 | 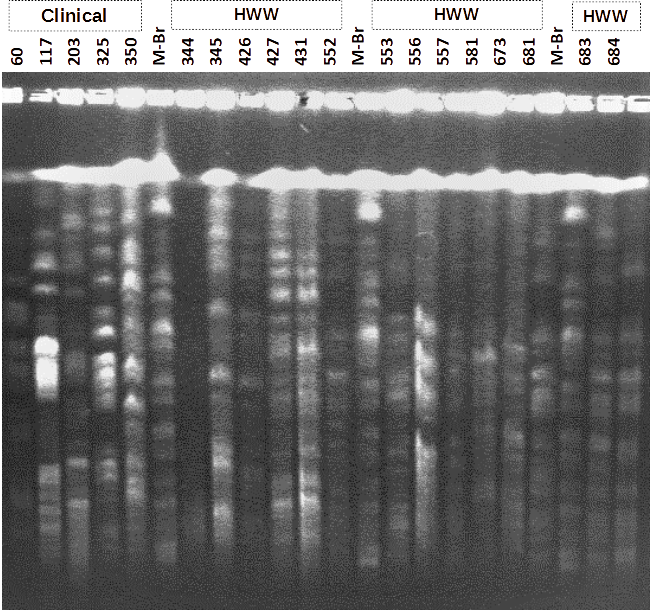 |
| --- | --- |
| **Supplementary Figure S1.** PFGE analysis; Diverse PFGE patterns of *E. coli* isolated from clinical and environmental samples.  Abbreviations: HWW, hospital wastewater; WWTP, wastewater treatment plant; RWS1, river water site 1; RWS2, river water site 2. | |


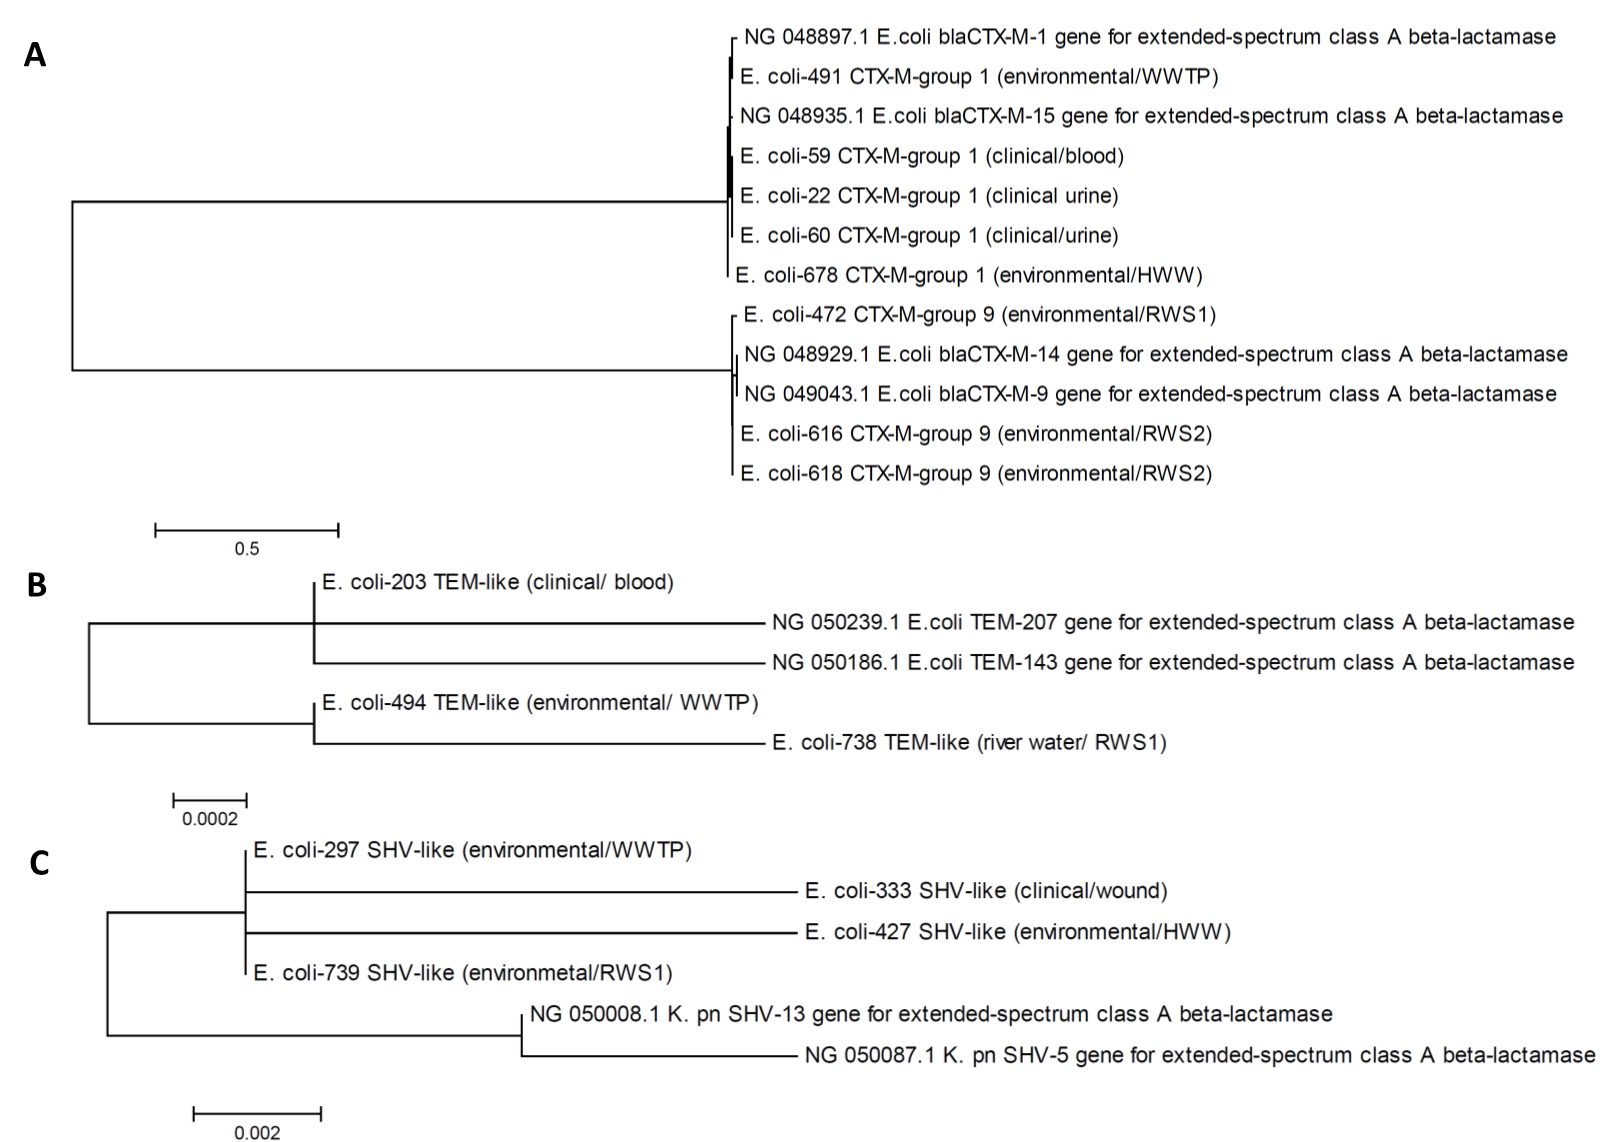


**Supplementary Figure S2:** Maximum Likelihood phylogenetic trees for A) *bla*CTX-M-groups, B) *bla*TEM and C) *bla*SHV nucleotide sequences.
